# Supplementary material for: Tailoring Household Disaster Preparedness Interventions to Reduce Health Disparities: Nursing Implications from Machine Learning Importance Features from the 2018–2020 FEMA National Household Survey
Source: MDPI journal article supplement (doi:10.3390/ijerph21050521), 2024-04-23
Supplement: s1 [file s1]

We have six supplemental tables that show (1) additional demographic variables of home ownership, FEMA region, number of adults living in the household and telephone usage (cell or landline); (2) a color version of Table S2 that is in the manuscript and Tables S3–S6 the importance feature rank (number 1–40), variable, variable description, X.IncMSE, and IncNodePurity for all four groups separately (Black racial identity and age 65+, Black racial identity, age 65+, total sample) to provide complete information with Table S2.

**Supplementary Table S1.** Additional demographic variables for the 2018, 2019 and 2020 National Household Surveys [54].

| Demographic characteristics              | <i>n</i> | %     |
|------------------------------------------|----------|-------|
| Rent/own home                            |          |       |
| Rent                                     | 4296     | 28.55 |
| Own                                      | 9769     | 64.92 |
| Don't know                               | 82       | 0.54  |
| Refused                                  | 610      | 4.05  |
| Other                                    | 291      | 1.93  |
| FEMA region                              |          |       |
| 1                                        | 320      | 2.13  |
| 2                                        | 1132     | 7.57  |
| 3                                        | 1032     | 6.86  |
| 4                                        | 3,390    | 22.53 |
| 5                                        | 1231     | 8.18  |
| 6                                        | 2078     | 13.81 |
| 7                                        | 513      | 3.41  |
| 8                                        | 722      | 4.80  |
| 9                                        | 3656     | 24.30 |
| 10                                       | 727      | 4.83  |
| Missing                                  | 247      | 1.64  |
| Number of adults living in the household |          |       |
| 1                                        | 3,668    | 24.38 |
| 2-5                                      | 10,695   | 71.07 |
| 6-10                                     | 193      | 1.28  |

|                 |       |       |
|-----------------|-------|-------|
| 11-20           | 25    | 0.17  |
| 21-30           | 5     | 0.03  |
| 31-40           | 2     | 0.01  |
| >41             | 17    | 0.11  |
| Telephone usage |       |       |
| Cell phone      |       |       |
| Yes             | 14130 | 93.90 |
| No              | 779   | 5.18  |
| Don't know      | 9     | 0.06  |
| Refused         | 130   | 0.86  |
| Landline        |       |       |
| Yes             | 6594  | 43.82 |
| No              | 8088  | 53.75 |
| Don't know      | 40    | 0.27  |
| Refused         | 326   | 2.17  |

Abbreviations: USD, United States Dollars; FEMA, Federal Emergency Management Agency.

**Supplementary Table S2.** Top 40 importance features disaggregated by primary groups of interest using appended data from the 2018, 2019 and 2020 National Household Surveys [54].

| Variable Description                                                                                                 | Answer                             | Category               | Importance Ranking by Group       |                       |         |              |
|----------------------------------------------------------------------------------------------------------------------|------------------------------------|------------------------|-----------------------------------|-----------------------|---------|--------------|
|                                                                                                                      |                                    |                        | Age 65+ and Black Racial Identity | Black Racial Identity | Age 65+ | Total Sample |
| "Does your plan include information about how to leave your community for an evacuation?"                            | No plan                            | EMERGENCY PLANS        | 1                                 | 1                     | 1       | 1            |
| "Does your plan include information about where to shelter or a safe place you can stay in the event of a disaster?" | Yes                                | EMERGENCY PLANS        | 2                                 | 2                     | 2       | 2            |
| "Which of the following best represents your (perceived level of) preparedness?"                                     | Been prepared for more than 1 year | STAGES OF PREPAREDNESS | 3                                 | 3                     | 3       | 3            |
| "How recently have you talked with others in your community about getting prepared for a disaster?"                  | I have not done this               | INFORMATION SEEKING    | 4                                 | 9                     | 5       | 8            |
| "Can you give me a ballpark figure for the amount you have set aside?"                                               | No savings                         | FINANCIAL PREPAREDNESS | 5                                 | 10                    | 7       | 7            |
| "How recently have you talked with others in your community about getting prepared for a disaster?"                  | Within the past year               | INFORMATION SEEKING    | 6                                 | 16                    | 8       | 14           |

|                                                                                                                                                                                   |                                                                        |                            |    |    |    |    |
|-----------------------------------------------------------------------------------------------------------------------------------------------------------------------------------|------------------------------------------------------------------------|----------------------------|----|----|----|----|
| "How many days do you think you could last in your home without power, running water, or transportation?"                                                                         | No supplies                                                            | SUPPLIES                   | 7  | 6  | 6  | 4  |
| Which of the following best represents your (perceived level of) preparedness?                                                                                                    | I am not prepared, but I intend to get prepared in the next six months | STAGES OF PREPAREDNESS     | 8  | 7  | 16 | 10 |
| How recently have you sought information about preparedness?                                                                                                                      | Within the past year                                                   | INFORMATION SEEKING        | 9  | 8  | 11 | 9  |
| "How recently have you sought information about preparedness?"                                                                                                                    | I have not done this                                                   | INFORMATION SEEKING        | 10 | 4  | 4  | 6  |
| "In the event of a disaster that required you to leave your area, would you need to rely on public transportation or the local authorities for transportation in order to leave?" | Yes                                                                    | EMERGENCY PLANS            | 11 | 24 | -  | 29 |
| "Do you have a flood insurance policy from the National Flood Insurance Program or from a private insurance company?"                                                             | No                                                                     | FINANCIAL PREPAREDNESS     | 12 | 18 | 34 | 26 |
| "How confident are you that you can take the steps to prepare for a disaster in your area?"                                                                                       | Extremely confident                                                    | EFFICACY - SELF-CONFIDENCE | 13 | -  | 18 | 13 |

|                                                                                                                                                               |                            |                            |    |    |    |    |
|---------------------------------------------------------------------------------------------------------------------------------------------------------------|----------------------------|----------------------------|----|----|----|----|
| "Do you have a flood insurance policy from the National Flood Insurance Program or from a private insurance company?"                                         | Yes                        | FINANCIAL PREPAREDNESS     | 14 | 17 | 32 | 22 |
| After receiving the information about how to get better prepared, did you take any steps to prepare for a disaster?                                           | Participant did not answer | CORE - INFORMATION         | 15 | 26 | -  | -  |
| "In the past six months, have you read, seen, or heard any information about how to get better prepared for a disaster?"                                      | No                         | CORE - INFORMATION         | 16 | 15 | 20 | 31 |
| Is there a reason you think you would not be able to take the steps to prepare?                                                                               | Participant did not answer | EFFICACY - SELF-CONFIDENCE | 17 | -  | 19 | 21 |
| "Can you give me a ballpark figure for the amount you have set aside?"                                                                                        | Refused                    | FINANCIAL PREPAREDNESS     | 18 | 29 | 36 | 38 |
| "Does your plan include information about where to shelter or a safe place you can stay in the event of a disaster?"                                          | No plan                    | EMERGENCY PLANS            | 19 | 14 | 9  | 12 |
| "In the past year, have you practiced what to do in a disaster by participating in a disaster preparedness exercise or drill? At another community location?" | No                         | DRILLS FOR ALL RESPONDENTS | 20 | 22 | 17 | 16 |

|                                                                                                                                                                                   |                               |                        |    |    |    |    |
|-----------------------------------------------------------------------------------------------------------------------------------------------------------------------------------|-------------------------------|------------------------|----|----|----|----|
| How did you get the information that you read, saw, or heard about getting better prepared for a disaster?                                                                        | Participant did not answer    | CORE - INFORMATION     | 21 | 25 | 22 | 30 |
| "How did you get the information that you read, saw, or heard about getting better prepared for a disaster?"                                                                      | TV, TV news, weather channels | STAGES OF PREPAREDNESS | 22 | -  | -  | -  |
| "In the event of a disaster that required you to leave your area, would you need to rely on public transportation or the local authorities for transportation in order to leave?" | No                            | EMERGENCY PLANS        | 23 | 38 | 30 | 24 |
| "Have you or your family ever experienced the impacts of a disaster?"                                                                                                             | Yes                           | DISASTER EXPERIENCE    | 24 | -  | 24 | -  |
| "In the past six months, have you read, seen, or heard any information about how to get better prepared for a disaster?"                                                          | Yes                           | CORE - INFORMATION     | 25 | 19 | 37 | 33 |

|                                                                                                                                                                                                                                                                                                                                           |                                                                    |                            |    |    |    |    |
|-------------------------------------------------------------------------------------------------------------------------------------------------------------------------------------------------------------------------------------------------------------------------------------------------------------------------------------------|--------------------------------------------------------------------|----------------------------|----|----|----|----|
| Thinking about preparing yourself for a disaster, have you developed and discussed an action plan with your family, that includes information about how to leave your community or where to shelter, and have set aside supplies such as, food, water, and other essentials that allow you to be self-sufficient for at least three days? | I have been prepared for more than a year and I continue preparing | STAGES OF PREPAREDNESS     | 26 | 22 | -  | -  |
| Thinking about preparing yourself for a disaster, have you developed and discussed an action plan with your family, that includes information about how to leave your community or where to shelter, and have set aside supplies such as, food, water, and other essentials that allow you to be self-sufficient for at least three days? | I have been prepared for the last year                             | STAGES OF PREPAREDNESS     | 27 | 5  | 10 | 5  |
| "In the past year, have you practiced what to do in a disaster by participating in a disaster preparedness exercise or drill? At work?"                                                                                                                                                                                                   | No                                                                 | DRILLS FOR ALL RESPONDENTS | 28 | 13 | 23 | 20 |

|                                                                                                                                                                                                                                                                         |                            |                            |    |    |    |    |
|-------------------------------------------------------------------------------------------------------------------------------------------------------------------------------------------------------------------------------------------------------------------------|----------------------------|----------------------------|----|----|----|----|
| "All areas of the country are subject to different types of disasters. Will you please name the types of disasters that would have the biggest impact where you live?"                                                                                                  | Tornado                    | RISK IDENTIFICATION        | 29 | -  | -  | -  |
| "How confident are you that you can take the steps to prepare for a disaster in your area?"                                                                                                                                                                             | Not at all confident       | EFFICACY - SELF-CONFIDENCE | 30 | 39 | -  | -  |
| What motivated you to take these steps to become better prepared? Please tell me the main reason.                                                                                                                                                                       | Participant did not answer | STAGES OF PREPAREDNESS     | 31 | -  | -  | -  |
| "In the past year, have you practiced what to do in a disaster by participating in a disaster preparedness exercise or drill? At another community location?"                                                                                                           | Yes                        | DRILLS FOR ALL RESPONDENTS | 32 | 29 | 15 | 19 |
| "Do you have a disability or a health condition that might affect your capacity to respond to an emergency situation? (INTERVIEWER: IF NECESSARY, READ:) A mobility, hearing, vision, cognitive, or intellectual disability or physical, mental, or health condition.)" | Yes                        | DEMOGRAPHICS               | 33 | 30 | -  | -  |



|                                                                                                                                                                                                                                                       |                                                                     |                        |    |    |    |    |
|-------------------------------------------------------------------------------------------------------------------------------------------------------------------------------------------------------------------------------------------------------|---------------------------------------------------------------------|------------------------|----|----|----|----|
| Which of the following best represents your (perceived level of) preparedness?                                                                                                                                                                        | I am not prepared, but I intend to start preparing in the next year | STAGES OF PREPAREDNESS | 34 | 12 | 33 | 18 |
| Which of the following best represents your (perceived level of) preparedness?                                                                                                                                                                        | I am not prepared, and I do not intend to prepare in the next year  | STAGES OF PREPAREDNESS | 35 | -  | 21 | 30 |
| "When did you or your family experience a disaster?"                                                                                                                                                                                                  | No experience                                                       | DISASTER EXPERIENCE    | 36 | -  | -  | -  |
| "How much would taking steps to prepare, such as creating a household emergency plan, developing an evacuation and shelter plan, signing up for alerts and warning systems, or stocking up on supplies help you get through a disaster in your area?" | Somewhat                                                            | STAGES OF PREPAREDNESS | 37 | -  | -  | -  |

|                                                                                                                                                                                                                                                                                                                                           |                                                                        |                        |    |    |    |   |
|-------------------------------------------------------------------------------------------------------------------------------------------------------------------------------------------------------------------------------------------------------------------------------------------------------------------------------------------|------------------------------------------------------------------------|------------------------|----|----|----|---|
| Thinking about preparing yourself for a disaster, have you developed and discussed an action plan with your family, that includes information about how to leave your community or where to shelter, and have set aside supplies such as, food, water, and other essentials that allow you to be self-sufficient for at least three days? | I am not prepared, but I intend to get prepared in the next six months | STAGES OF PREPAREDNESS | 38 | -  | -  | - |
| "What was the information that you read, saw, or heard about how to get better prepared for a disaster?"                                                                                                                                                                                                                                  | No information                                                         | STAGES OF PREPAREDNESS | 39 | 23 | 28 | - |
| "All areas of the country are subject to different types of disasters. Will you please name the types of disasters that would have the biggest impact where you live?"                                                                                                                                                                    | A major snowstorm                                                      | RISK IDENTIFICATION    | 40 | -  | -  | - |

Footnote: Importance features are numbered by most important to less important, 1 - 40. A dash indicates the variable was not included in a particular group's top 40 importance features. The background shading indicates the ranking of importance features from most to least important (green to red).

**Supplementary Table S3.** Top 40 importance features for 65 Years and Older and Black Racial Identity using appended data from the 2018, 2019 and 2020 National Household Surveys [54].

| Importance<br>Feature Rank | Variable for 65 Years<br>and Older and Black<br>Racial Identity | Variable Description                                                                                               | X.IncMSE    | IncNodePurity |
|----------------------------|-----------------------------------------------------------------|--------------------------------------------------------------------------------------------------------------------|-------------|---------------|
| 1                          | b6_1_                                                           | Does your plan include information about how to leave your community for an evacuation?                            | 0.014329438 | 2.432309016   |
| 2                          | b6_1_YES                                                        | Does your plan include information about where to shelter or a safe place you can stay in the event of a disaster? | 0.012119855 | 1.961971329   |
| 3                          | st_stg1_I.HAVE.BEEN.PREPARED.FOR.MORE                           | Which of the following best represents your (perceived level of) preparedness?                                     | 0.002491092 | 0.564541965   |
| 4                          | b2b_I.HAVE.NOT.DONE.THIS                                        | How recently have you talked with others in your community about getting prepared for a disaster?                  | 0.001945243 | 0.366684511   |
| 5                          | fp4_1_                                                          | Can you give me a ballpark figure for the amount you have set aside?                                               | 0.001274035 | 0.230091212   |
| 6                          | b2b_WITHIN.THE.PAST.YEAR                                        | How recently have you talked with others in your community about getting prepared for a disaster?                  | 0.001218232 | 0.323881563   |
| 7                          | b10                                                             | How many days do you think you could last in your home without power, running water, or transportation?            | 0.001194423 | 0.359234314   |
| 8                          | st_stg1_I.AM.NOT.PREPARED..BUT.I.INTEND.TO.GET                  | Which of the following best represents your (perceived level of) preparedness?                                     | 0.000814904 | 0.171036438   |
| 9                          | b2c_WITHIN.THE.PAST.YEAR                                        | How recently have you sought information about preparedness?                                                       | 0.000749693 | 0.326522056   |

|    |                              |                                                                                                                                                                                 |             |             |
|----|------------------------------|---------------------------------------------------------------------------------------------------------------------------------------------------------------------------------|-------------|-------------|
| 10 | b2c_I.HAVE.NOT.DONE.<br>THIS | How recently have you sought information about preparedness?                                                                                                                    | 0.000736454 | 0.386149393 |
| 11 | b6a_YES                      | In the event of a disaster that required you to leave your area, would you need to rely on public transportation or the local authorities for transportation in order to leave? | 0.000454245 | 0.100502724 |
| 12 | fp2_NO                       | Do you have a flood insurance policy from the National Flood Insurance Program or from a private insurance company?                                                             | 0.000439624 | 0.136991809 |
| 13 | c2_EXTREMELY.CONFI<br>DENT   | How confident are you that you can take the steps to prepare for a disaster in your area?                                                                                       | 0.000414527 | 0.078636871 |
| 14 | fp2_YES                      | Do you have a flood insurance policy from the National Flood Insurance Program or from a private insurance company?                                                             | 0.000407221 | 0.093234709 |
| 15 | a2b_                         | After receiving the information about how to get better prepared, did you take any steps to prepare for a disaster?                                                             | 0.000399129 | 0.135750058 |
| 16 | a1_NO                        | In the past six months, have you read, seen, or heard any information about how to get better prepared for a disaster?                                                          | 0.000397055 | 0.106633887 |
| 17 | c2a_                         | Is there a reason you think you would not be able to take the steps to prepare?                                                                                                 | 0.000352556 | 0.096210618 |
| 18 | fp4_1_REFUSED                | Can you give me a ballpark figure for the amount you have set aside?                                                                                                            | 0.000327386 | 0.090551415 |
| 19 | b6_1_NO                      | Does your plan include information about where to shelter or a safe place you can stay in the event of a disaster?                                                              | 0.000303314 | 0.118268234 |
| 20 | b3d_NO                       | In the past year, have you practiced what to do in a disaster by participating in a disaster preparedness exercise or drill? At another community location?                     | 0.00028385  | 0.06277185  |

|    |                                                        |                                                                                                                                                                                                                                                                                                                                           |             |             |
|----|--------------------------------------------------------|-------------------------------------------------------------------------------------------------------------------------------------------------------------------------------------------------------------------------------------------------------------------------------------------------------------------------------------------|-------------|-------------|
| 21 | a1a_orig201_                                           | How did you get the information that you read, saw, or heard about getting better prepared for a disaster?                                                                                                                                                                                                                                | 0.000276716 | 0.083573853 |
| 22 | a1a_orig201_TV..TV.NE<br>WS..WEATHER.CHANNE<br>LS      | How did you get the information that you read, saw, or heard about getting better prepared for a disaster?                                                                                                                                                                                                                                | 0.000264782 | 0.054280841 |
| 23 | b6a_NO                                                 | In the event of a disaster that required you to leave your area, would you need to rely on public transportation or the local authorities for transportation in order to leave?                                                                                                                                                           | 0.000254527 | 0.068826839 |
| 24 | genexp1_YES                                            | Have you or your family ever experienced the impacts of a disaster?                                                                                                                                                                                                                                                                       | 0.000224392 | 0.056588231 |
| 25 | a1_YES                                                 | In the past six months, have you read, seen, or heard any information about how to get better prepared for a disaster?                                                                                                                                                                                                                    | 0.000222214 | 0.096703329 |
| 26 | hz_stg1_I.HAVE.BEEN.P<br>REPARED.FOR.MORE              | Thinking about preparing yourself for a disaster, have you developed and discussed an action plan with your family, that includes information about how to leave your community or where to shelter, and have set aside supplies such as, food, water, and other essentials that allow you to be self-sufficient for at least three days? | 0.000210247 | 0.054308821 |
| 27 | st_stg1_I.HAVE.BEEN.PR<br>EPARED.FOR.THE.LAST<br>.YEAR | Thinking about preparing yourself for a disaster, have you developed and discussed an action plan with your family, that includes information about how to leave your community or where to shelter, and have set aside supplies such as, food, water, and other essentials that allow you to be self-sufficient for at least three days? | 0.000193937 | 0.083559999 |
| 28 | b3b_NO                                                 | In the past year, have you practiced what to do in a disaster by participating in a disaster preparedness exercise or drill? At work?                                                                                                                                                                                                     | 0.000190513 | 0.079868873 |
| 29 | b101_A.TORNADO                                         | All areas of the country are subject to different types of disasters. Will you please name the types of disasters that would have the biggest impact where you live?                                                                                                                                                                      | 0.000182762 | 0.108550993 |
| 30 | c2_NOT.AT.ALL.CONFID<br>ENT                            | How confident are you that you can take the steps to prepare for a disaster in your area? Would you say you are...                                                                                                                                                                                                                        | 0.000177868 | 0.043192359 |

|    |                                               |                                                                                                                                                                                                                                                                                                                                           |             |             |
|----|-----------------------------------------------|-------------------------------------------------------------------------------------------------------------------------------------------------------------------------------------------------------------------------------------------------------------------------------------------------------------------------------------------|-------------|-------------|
| 31 | a1dcode_                                      | What motivated you to take these steps to become better prepared? Please tell me the main reason.                                                                                                                                                                                                                                         | 0.000175014 | 0.058457287 |
| 32 | b3d_YES                                       | In the past year, have you practiced what to do in a disaster by participating in a disaster preparedness exercise or drill? At another community location?                                                                                                                                                                               | 0.000155029 | 0.069032167 |
| 33 | d4a_YES                                       | Do you have a disability or a health condition that might affect your capacity to respond to an emergency situation? (INTERVIEWER: IF NECESSARY, READ:) A mobility, hearing, vision, cognitive, or intellectual disability or physical, mental, or health condition.)                                                                     | 0.000144438 | 0.079222669 |
| 34 | st_stg1_I.AM.NOT.PREPARED..BUT.I.INTEND.TO.ST | Which of the following best represents your (perceived level of) preparedness?                                                                                                                                                                                                                                                            | 0.000143942 | 0.055080695 |
| 35 | st_stg1_I.AM.NOT.PREPARED..AND.I.DO.NOT       | Which of the following best represents your (perceived level of) preparedness?                                                                                                                                                                                                                                                            | 0.000142557 | 0.06823186  |
| 36 | genexp12_cat_                                 | When did you or your family experience a disaster? How much would taking steps to prepare, such as creating a household emergency plan, developing an evacuation and shelter plan, signing up for alerts and warning systems, or stocking up on supplies help you get through a disaster in your area? Would it help                      | 0.000134949 | 0.044472379 |
| 37 | c1_SOMEWHAT                                   | Thinking about preparing yourself for a disaster, have you developed and discussed an action plan with your family, that includes information about how to leave your community or where to shelter, and have set aside supplies such as, food, water, and other essentials that allow you to be self-sufficient for at least three days? | 0.00012865  | 0.076670593 |
| 38 | hz_stg1_I.AM.NOT.PREPARED..BUT.I.INTEND.TO.GE |                                                                                                                                                                                                                                                                                                                                           | 0.00010996  | 0.031844319 |
| 39 | a1a_orig101_                                  | What was the information that you read, saw, or heard about how to get better prepared for a disaster?                                                                                                                                                                                                                                    | 0.00010408  | 0.064222635 |
| 40 | b101_A.MAJOR.SNOWS.TORM                       | All areas of the country are subject to different types of disasters. Will you please name the types of disasters that would have the biggest impact where you live?                                                                                                                                                                      | 0.000102021 | 0.033420088 |

**Supplementary Table S4.** Top 40 importance features for Black Racial Identity using appended data from the 2018, 2019 and 2020 National Household Surveys [54].

| Importance<br>Feature<br>Rank | Variable for Black<br>Racial Identity                  | Variable Description                                                                                                                                                                                                                                                                                                                      | X.IncMSE    | IncNodePurity |
|-------------------------------|--------------------------------------------------------|-------------------------------------------------------------------------------------------------------------------------------------------------------------------------------------------------------------------------------------------------------------------------------------------------------------------------------------------|-------------|---------------|
| 1                             | b6_1_                                                  | Does your plan include information about how to leave your community for an evacuation?                                                                                                                                                                                                                                                   | 0.015537012 | 12.38820039   |
| 2                             | b6_1_YES                                               | Does your plan include information about where to shelter or a safe place you can stay in the event of a disaster?                                                                                                                                                                                                                        | 0.010056289 | 9.013570339   |
| 3                             | st_stg1_I.HAVE.BEE<br>N.PREPARED.FOR.<br>MORE          | Which of the following best represents your (perceived level of) preparedness?                                                                                                                                                                                                                                                            | 0.005095154 | 3.420727261   |
| 4                             | b2c_I.HAVE.NOT.DO<br>NE.THIS                           | How recently have you sought information about preparedness?                                                                                                                                                                                                                                                                              | 0.00159505  | 2.269248656   |
| 5                             | st_stg1_I.HAVE.BEE<br>N.PREPARED.FOR.T<br>HE.LAST.YEAR | Thinking about preparing yourself for a disaster, have you developed and discussed an action plan with your family, that includes information about how to leave your community or where to shelter, and have set aside supplies such as, food, water, and other essentials that allow you to be self-sufficient for at least three days? | 0.001282471 | 0.969962526   |
| 6                             | b10                                                    | How many days do you think you could last in your home without power, running water, or transportation?                                                                                                                                                                                                                                   | 0.001172069 | 1.30146007    |
| 7                             | st_stg1_I.AM.NOT.PR<br>EPARED..BUT.I.INTEN<br>D.TO.GE  | Which of the following best represents your (perceived level of) preparedness?                                                                                                                                                                                                                                                            | 0.000976308 | 0.66425605    |

|    |                                                       |                                                                                                                                       |             |             |
|----|-------------------------------------------------------|---------------------------------------------------------------------------------------------------------------------------------------|-------------|-------------|
| 8  | b2c_WITHIN.THE.PAS<br>T.YEAR                          | How recently have you sought information about preparedness?                                                                          | 0.000846639 | 1.110468104 |
| 9  | b2b_I.HAVE.NOT.DON<br>E.THIS                          | How recently have you talked with others in your community about getting prepared for a disaster?                                     | 0.000824237 | 0.903501979 |
| 10 | fp4_1_                                                | How recently have you talked with others in your community about getting prepared for a disaster?                                     | 0.000673229 | 0.455127463 |
| 11 | b3b_YES                                               | Can you give me a ballpark figure for the amount you have set aside?                                                                  | 0.00060631  | 0.462409374 |
| 12 | st_stg1_I.AM.NOT.PR<br>EPARED..BUT.I.INTEN<br>D.TO.ST | Which of the following best represents your (perceived level of) preparedness?                                                        | 0.000550973 | 0.34540015  |
| 13 | b3b_NO                                                | In the past year, have you practiced what to do in a disaster by participating in a disaster preparedness exercise or drill? At work? | 0.000502227 | 0.456670658 |
| 14 | b6_1_NO                                               | Does your plan include information about where to shelter or a safe place you can stay in the event of a disaster?                    | 0.000433802 | 0.550972062 |
| 15 | a1_NO                                                 | In the past six months, have you read, seen, or heard any information about how to get better prepared for a disaster?                | 0.000370463 | 0.369724993 |
| 16 | b2b_WITHIN.THE.PAS<br>T.YEAR                          | How recently have you talked with others in your community about getting prepared for a disaster?                                     | 0.000332268 | 0.422733187 |
| 17 | fp2_YES                                               | Do you have a flood insurance policy from the National Flood Insurance Program or from a private insurance company?                   | 0.000327096 | 0.400219008 |
| 18 | fp2_NO                                                | Do you have a flood insurance policy from the National Flood Insurance Program or from a private insurance company?                   | 0.000266017 | 0.264669771 |



|    |                                               |                                                                                                                                                                                                                                                                                                                                                                                                                                                                                                       |             |             |
|----|-----------------------------------------------|-------------------------------------------------------------------------------------------------------------------------------------------------------------------------------------------------------------------------------------------------------------------------------------------------------------------------------------------------------------------------------------------------------------------------------------------------------------------------------------------------------|-------------|-------------|
| 19 | a1_YES                                        | In the past six months, have you read, seen, or heard any information about how to get better prepared for a disaster?                                                                                                                                                                                                                                                                                                                                                                                | 0.000236728 | 0.554126054 |
| 20 | d8_OWN                                        | Do you rent or own your home?                                                                                                                                                                                                                                                                                                                                                                                                                                                                         | 0.000220788 | 0.34591855  |
| 21 | b3d_NO                                        | In the past year, have you practiced what to do in a disaster by participating in a disaster preparedness exercise or drill? At another community location? Thinking about preparing yourself for a disaster, have you developed and discussed an action plan with your family, that includes information about how to leave your community or where to shelter, and have set aside supplies such as, food, water, and other essentials that allow you to be self-sufficient for at least three days? | 0.000211931 | 0.217404088 |
| 22 | hz_stg1_I.HAVE.BEEN<br>.PREPARED.FOR.MO<br>RE |                                                                                                                                                                                                                                                                                                                                                                                                                                                                                                       | 0.000204656 | 0.151260815 |
| 23 | a1a_orig101_                                  | What was the information that you read, saw, or heard about how to get better prepared for a disaster?                                                                                                                                                                                                                                                                                                                                                                                                | 0.00019868  | 0.351854178 |
| 24 | b6a_YES                                       | In the event of a disaster that required you to leave your area, would you need to rely on public transportation or the local authorities for transportation in order to leave?                                                                                                                                                                                                                                                                                                                       | 0.000174266 | 0.223773912 |
| 25 | a1a_orig201_                                  | How did you get the information that you read, saw, or heard about getting better prepared for a disaster?                                                                                                                                                                                                                                                                                                                                                                                            | 0.000158448 | 0.386013755 |
| 26 | a2b_                                          | After receiving the information about how to get better prepared, did you take any steps to prepare for a disaster?                                                                                                                                                                                                                                                                                                                                                                                   | 0.000155652 | 0.3672497   |
| 27 | a2b_YES                                       | After receiving the information about how to get better prepared, did you take any steps to prepare for a disaster?                                                                                                                                                                                                                                                                                                                                                                                   | 0.00013695  | 0.293471783 |
| 28 | fp4_1_REFUSED                                 | Can you give me a ballpark figure for the amount you have set aside?                                                                                                                                                                                                                                                                                                                                                                                                                                  | 0.000120627 | 0.123772278 |

|    |                                     |                                                                                                                                                                                                                                                                       |             |             |
|----|-------------------------------------|-----------------------------------------------------------------------------------------------------------------------------------------------------------------------------------------------------------------------------------------------------------------------|-------------|-------------|
| 29 | b3d_YES                             | In the past year, have you practiced what to do in a disaster by participating in a disaster preparedness exercise or drill? At another community location?                                                                                                           | 0.000119734 | 0.143672532 |
| 30 | d4a_YES                             | Do you have a disability or a health condition that might affect your capacity to respond to an emergency situation? (INTERVIEWER: IF NECESSARY, READ:) A mobility, hearing, vision, cognitive, or intellectual disability or physical, mental, or health condition.) | 0.000101654 | 0.154122375 |
| 31 | d12_                                | Of all the telephone calls your household receives, would you say that...                                                                                                                                                                                             | 9.70E-05    | 0.15034018  |
| 32 | d4a_NO                              | Do you have a disability or a health condition that might affect your capacity to respond to an emergency situation?                                                                                                                                                  | 9.68E-05    | 0.184665449 |
| 33 | a1a_orig102_                        | What was the information that you read, saw, or heard about how to get better prepared for a disaster? (2nd response of up to 2)                                                                                                                                      | 9.31E-05    | 0.091245763 |
| 34 | d2_POST.GRADUATE.<br>WORK.OR.DEGREE | What is your highest completed level of education?                                                                                                                                                                                                                    | 9.06E-05    | 0.142991207 |
| 35 | b10_3_YES                           | Do you have supplies to stay for 24 hours at any other place you frequent?                                                                                                                                                                                            | 8.51E-05    | 0.088726913 |
| 36 | b3c_NO                              | In the past year, have you practiced what to do in a disaster by participating in a disaster preparedness exercise or drill? At school?                                                                                                                               | 8.26E-05    | 0.137128628 |
| 37 | d8_RENT                             | Do you rent or own your home?                                                                                                                                                                                                                                         | 7.64E-05    | 0.220243419 |
| 38 | b6a_NO                              | In the event of a disaster that required you to leave your area, would you need to rely on public transportation or the local authorities for transportation in order to leave?                                                                                       | 7.53E-05    | 0.208612461 |

|    |                             |                                                                                                                          |          |             |
|----|-----------------------------|--------------------------------------------------------------------------------------------------------------------------|----------|-------------|
| 39 | c2_NOT.AT.ALL.CONF<br>IDENT | How confident are you that you can take the steps<br>to prepare for a disaster in your area? Would you<br>say you are... | 7.41E-05 | 0.102301228 |
| 40 | genexp1_NO                  | Have you or your family ever experienced the<br>impacts of a disaster?                                                   | 7.40E-05 | 0.109840905 |

**Supplementary Table S5.** Top 40 importance features for 65 years and older using appended data from the 2018, 2019 and 2020 National Household Surveys [54].

| Importance<br>Feature<br>Rank | Variable for 65 Years<br>and Older         | Variable Description                                                                                                     | X.IncMSE    | IncNodePurity |
|-------------------------------|--------------------------------------------|--------------------------------------------------------------------------------------------------------------------------|-------------|---------------|
| 1                             | b6_1_                                      | Does your plan include information about how to<br>leave your community for an evacuation?                               | 0.013248756 | 29.66588376   |
| 2                             | b6_1_YES                                   | Does your plan include information about where<br>to shelter or a safe place you can stay in the<br>event of a disaster? | 0.006230234 | 16.48670121   |
| 3                             | st_stg1_I.HAVE.BEEN.P<br>REPAIRED.FOR.MORE | Which of the following best represents your<br>(perceived level of) preparedness?                                        | 0.003214382 | 9.733042803   |
| 4                             | b2c_I.HAVE.NOT.DONE<br>.THIS               | How recently have you sought information about<br>preparedness?                                                          | 0.001220138 | 4.84434617    |
| 5                             | b2b_I.HAVE.NOT.DONE<br>.THIS               | How recently have you talked with others in<br>your community about getting prepared for a<br>disaster?                  | 0.001078267 | 4.442502956   |
| 6                             | b10                                        | How many days do you think you could last in<br>your home without power, running water, or<br>transportation?            | 0.001048985 | 3.420407207   |

|    |                                                         |                                                                                                                                                                                                                                                                                                                                           |             |             |
|----|---------------------------------------------------------|-------------------------------------------------------------------------------------------------------------------------------------------------------------------------------------------------------------------------------------------------------------------------------------------------------------------------------------------|-------------|-------------|
| 7  | fp4_1_                                                  | Can you give me a ballpark figure for the amount you have set aside?                                                                                                                                                                                                                                                                      | 0.000805563 | 1.645920884 |
| 8  | b2b_WITHIN.THE.PAST<br>.YEAR                            | How recently have you talked with others in your community about getting prepared for a disaster?                                                                                                                                                                                                                                         | 0.000716656 | 2.9591149   |
| 9  | b6_1_NO                                                 | Does your plan include information about where to shelter or a safe place you can stay in the event of a disaster?                                                                                                                                                                                                                        | 0.000544714 | 1.645149644 |
| 10 | st_stg1_I.HAVE.BEEN.P<br>REPAIRED.FOR.THE.LA<br>ST.YEAR | Thinking about preparing yourself for a disaster, have you developed and discussed an action plan with your family, that includes information about how to leave your community or where to shelter, and have set aside supplies such as, food, water, and other essentials that allow you to be self-sufficient for at least three days? | 0.000532435 | 1.517311705 |
| 11 | b2c_WITHIN.THE.PAST<br>.YEAR                            | How recently have you sought information about preparedness?                                                                                                                                                                                                                                                                              | 0.000509239 | 2.060664747 |
| 12 | d8_RENT                                                 | Do you rent or own your home?                                                                                                                                                                                                                                                                                                             | 0.000489978 | 1.676487067 |
| 13 | d8_OWEN                                                 | Do you rent or own your home?                                                                                                                                                                                                                                                                                                             | 0.000380223 | 1.496146224 |
| 14 | a2b_YES                                                 | After receiving the information about how to get better prepared, did you take any steps to prepare for a disaster?                                                                                                                                                                                                                       | 0.000341621 | 1.5922901   |
| 15 | b3d_YES                                                 | In the past year, have you practiced what to do in a disaster by participating in a disaster preparedness exercise or drill? At another community location?                                                                                                                                                                               | 0.000288788 | 0.706061896 |
| 16 | st_stg1_I.AM.NOT.PRE<br>PARED..BUT.I.INTEND.<br>TO.GE   | Which of the following best represents your (perceived level of) preparedness?                                                                                                                                                                                                                                                            | 0.000288495 | 0.606678878 |

|    |                                         |                                                                                                                                                                                             |             |             |
|----|-----------------------------------------|---------------------------------------------------------------------------------------------------------------------------------------------------------------------------------------------|-------------|-------------|
| 17 | b3d_NO                                  | In the past year, have you practiced what to do in a disaster by participating in a disaster preparedness exercise or drill? At another community location?                                 | 0.000260258 | 0.676830324 |
| 18 | c2_EXTREMELY.CONFIDENT                  | How confident are you that you can take the steps to prepare for a disaster in your area?                                                                                                   | 0.000182186 | 0.779207871 |
| 19 | c2a_                                    | Is there a reason you think you would not be able to take the steps to prepare?                                                                                                             | 0.000167038 | 0.552462946 |
| 20 | a1_NO                                   | In the past six months, have you read, seen, or heard any information about how to get better prepared for a disaster?                                                                      | 0.000163696 | 0.562308401 |
| 21 | st_stg1_I.AM.NOT.PREPARED..AND.I.DO.NOT | Which of the following best represents your (perceived level of) preparedness?                                                                                                              | 0.000120565 | 0.267402564 |
| 22 | a1a_orig201_                            | How did you get the information that you read, saw, or heard about getting better prepared for a disaster?                                                                                  | 0.000112047 | 0.437967556 |
| 23 | b3b_NO                                  | In the past year, have you practiced what to do in a disaster by participating in a disaster preparedness exercise or drill? At work?                                                       | 9.86E-05    | 0.503816592 |
| 24 | genexp1_YES                             | Have you or your family ever experienced the impacts of a disaster?                                                                                                                         | 9.67E-05    | 0.254231734 |
| 25 | d13_.1.000.TO..1.999                    | What is your total MONTHLY household income, before taxes? Please include income from wages and salaries, remittances from family members living elsewhere, farming, and all other sources. | 9.45E-05    | 0.43095859  |
| 26 | d3_YES                                  | What is your total MONTHLY household income, before taxes? Please include income from wages and salaries, remittances from family members living elsewhere, farming, and all other sources. | 9.45E-05    | 0.527183891 |

|    |                                                       |                                                                                                                                                                                 |          |             |
|----|-------------------------------------------------------|---------------------------------------------------------------------------------------------------------------------------------------------------------------------------------|----------|-------------|
| 27 | d15_YES                                               | Is English the primary or main language spoken among those living in your household?                                                                                            | 9.38E-05 | 0.338274784 |
| 28 | a1a_orig101_                                          | What was the information that you read, saw, or heard about how to get better prepared for a disaster?                                                                          | 9.26E-05 | 0.395361093 |
| 29 | d11_NO                                                | Do you have a cell phone that you use to make and receive personal calls?                                                                                                       | 9.08E-05 | 0.421546184 |
| 30 | b6a_NO                                                | In the event of a disaster that required you to leave your area, would you need to rely on public transportation or the local authorities for transportation in order to leave? | 8.98E-05 | 0.55239174  |
| 31 | d15_NO                                                | Is English the primary or main language spoken among those living in your household?                                                                                            | 8.82E-05 | 0.328019236 |
| 32 | fp2_YES                                               | Do you have a flood insurance policy from the National Flood Insurance Program or from a private insurance company?                                                             | 8.73E-05 | 0.378851867 |
| 33 | st_stg1_I.AM.NOT.PRE<br>PARED..BUT.I.INTEND.<br>TO.ST | Which of the following best represents your (perceived level of) preparedness?                                                                                                  | 8.62E-05 | 0.356070063 |
| 34 | fp2_NO                                                | Do you have a flood insurance policy from the National Flood Insurance Program or from a private insurance company?                                                             | 7.69E-05 | 0.376814452 |
| 35 | d2_LESS.THAN.HIGH.S<br>CHOOL.DIPLOMA                  | What is your highest completed level of education?                                                                                                                              | 7.68E-05 | 0.470853045 |
| 36 | fp4_1_REFUSED                                         | Can you give me a ballpark figure for the amount you have set aside?                                                                                                            | 7.60E-05 | 0.375316859 |
| 37 | a1_YES                                                | In the past six months, have you read, seen, or heard any information about how to get better prepared for a disaster?                                                          | 7.49E-05 | 0.489668742 |

|           |                  |                                                                                                                                                                                                                    |          |             |
|-----------|------------------|--------------------------------------------------------------------------------------------------------------------------------------------------------------------------------------------------------------------|----------|-------------|
| <b>38</b> | b3b_YES          | In the past year, have you practiced what to do in a disaster by participating in a disaster preparedness exercise or drill? At work?                                                                              | 7.47E-05 | 0.385918723 |
| <b>39</b> | white_only       | Describe your race.<br>What is your total MONTHLY household income, before taxes? Please include income from wages and salaries, remittances from family members living elsewhere, farming, and all other sources. | 7.24E-05 | 0.554590291 |
| <b>40</b> | d13_.500.TO..999 |                                                                                                                                                                                                                    | 6.96E-05 | 0.408834697 |

**Supplementary Table S6.** Top 40 importance features for total sample using appended data from the 2018, 2019 and 2020 National Household Surveys [54].

| <b>Importance<br/>Feature<br/>Rank</b> | <b>Variable for Total<br/>Sample</b>          | <b>Variable Description</b>                                                                                        | <b>X.IncMSE</b> | <b>IncNodePurity</b> |
|----------------------------------------|-----------------------------------------------|--------------------------------------------------------------------------------------------------------------------|-----------------|----------------------|
| <b>1</b>                               | b6_1_                                         | Does your plan include information about how to leave your community for an evacuation?                            | 0.013085328     | 111.2465689          |
| <b>2</b>                               | b6_1_YES                                      | Does your plan include information about where to shelter or a safe place you can stay in the event of a disaster? | 0.005638424     | 64.88549302          |
| <b>3</b>                               | st_stg1_I.HAVE.BEE<br>N.PREPARED.FOR.M<br>ORE | Which of the following best represents your (perceived level of) preparedness?                                     | 0.005592052     | 46.27837258          |
| <b>4</b>                               | b10                                           | How many days do you think you could last in your home without power, running water, or transportation?            | 0.001700082     | 14.51498766          |

|    |                                                        |                                                                                                                     |             |             |
|----|--------------------------------------------------------|---------------------------------------------------------------------------------------------------------------------|-------------|-------------|
| 5  | st_stg1_I.HAVE.BEE<br>N.PREPARED.FOR.T<br>HE.LAST.YEAR | Which of the following best represents your (perceived level of) preparedness?                                      | 0.001621637 | 11.16030869 |
| 6  | b2c_I.HAVE.NOT.DO<br>NE.THIS                           | How recently have you sought information about preparedness?                                                        | 0.001111868 | 17.47013338 |
| 7  | fp4_1_                                                 | Can you give me a ballpark figure for the amount you have set aside?                                                | 0.000898553 | 5.775548754 |
| 8  | b2b_I.HAVE.NOT.DO<br>NE.THIS                           | How recently have you talked with others in your community about getting prepared for a disaster?                   | 0.00088133  | 14.54051772 |
| 9  | b2c_WITHIN.THE.PA<br>ST.YEAR                           | How recently have you sought information about preparedness?                                                        | 0.000646657 | 7.421689142 |
| 10 | st_stg1_I.AM.NOT.PR<br>EPARED..BUT.I.INTE<br>ND.TO.GE  | Which of the following best represents your (perceived level of) preparedness?                                      | 0.000642929 | 4.276641999 |
| 11 | d8_OWN                                                 | Do you rent or own your home?                                                                                       | 0.000642021 | 7.497732906 |
| 12 | b6_1_NO                                                | Does your plan include information about where to shelter or a safe place you can stay in the event of a disaster?  | 0.000503619 | 5.114550837 |
| 13 | c2_EXTREMELY.CO<br>NFIDENT                             | How confident are you that you can take the steps to prepare for a disaster in your area?                           | 0.000396384 | 3.621858808 |
| 14 | b2b_WITHIN.THE.PA<br>ST.YEAR                           | How recently have you talked with others in your community about getting prepared for a disaster?                   | 0.000394878 | 6.301341763 |
| 15 | a2b_YES                                                | After receiving the information about how to get better prepared, did you take any steps to prepare for a disaster? | 0.000322898 | 3.676677031 |



|    |                                               |                                                                                                                                                                                 |             |             |
|----|-----------------------------------------------|---------------------------------------------------------------------------------------------------------------------------------------------------------------------------------|-------------|-------------|
| 16 | b3d_NO                                        | In the past year, have you practiced what to do in a disaster by participating in a disaster preparedness exercise or drill? At another community location?                     | 0.000315951 | 2.735221287 |
| 17 | d8_RENT                                       | Do you rent or own your home?                                                                                                                                                   | 0.000288729 | 3.563784429 |
| 18 | st_stg1_I.AM.NOT.PREPARED..BUT.I.INTEND.TO.ST | Which of the following best represents your (perceived level of) preparedness?                                                                                                  | 0.0002556   | 1.802560224 |
| 19 | b3d_YES                                       | In the past year, have you practiced what to do in a disaster by participating in a disaster preparedness exercise or drill? At another community location?                     | 0.000231276 | 2.217080092 |
| 20 | b3b_NO                                        | In the past year, have you practiced what to do in a disaster by participating in a disaster preparedness exercise or drill? At work?                                           | 0.000205256 | 2.219402793 |
| 21 | c2a_                                          | Is there a reason you think you would not be able to take the steps to prepare?                                                                                                 | 0.000199315 | 2.3486113   |
| 22 | fp2_YES                                       | Do you have a flood insurance policy from the National Flood Insurance Program or from a private insurance company?                                                             | 0.000193921 | 1.698002543 |
| 23 | d3_YES                                        |                                                                                                                                                                                 | 0.000174255 | 1.90190422  |
| 24 | b6a_NO                                        | In the event of a disaster that required you to leave your area, would you need to rely on public transportation or the local authorities for transportation in order to leave? | 0.000145538 | 2.325690293 |
| 25 | b3b_YES                                       | In the past year, have you practiced what to do in a disaster by participating in a disaster preparedness exercise or drill? At work?                                           | 0.000145091 | 1.726271459 |
| 26 | fp2_NO                                        | Do you have a flood insurance policy from the National Flood Insurance Program or from a private insurance company?                                                             | 0.000120436 | 1.475069881 |

|    |                                                 |                                                                                                                                                                                             |             |             |
|----|-------------------------------------------------|---------------------------------------------------------------------------------------------------------------------------------------------------------------------------------------------|-------------|-------------|
| 27 | d3_NO                                           | Are you of Hispanic, Latino, or Spanish origin - such as Mexican, Puerto Rican, Cuban, or other Spanish origin?                                                                             | 0.000114981 | 1.483470179 |
| 28 | d2_LESS.THAN.HIGH<br>.SCHOOL.DIPLOMA            | What is your highest completed level of education?                                                                                                                                          | 0.000112383 | 1.614758361 |
| 29 | b6a_YES                                         | In the event of a disaster that required you to leave your area, would you need to rely on public transportation or the local authorities for transportation in order to leave?             | 0.000110096 | 1.761719307 |
| 30 | st_stg1_I.AM.NOT.PR<br>EPARED..AND.I.DO.<br>NOT | Which of the following best represents your (perceived level of) preparedness?                                                                                                              | 0.000102038 | 0.855599747 |
| 31 | a1_NO                                           | In the past six months, have you read, seen, or heard any information about how to get better prepared for a disaster?                                                                      | 8.83E-05    | 1.046483147 |
| 32 | d15_NO                                          | Is English the primary or main language spoken among those living in your household?                                                                                                        | 7.68E-05    | 1.085714035 |
| 33 | a1_YES                                          | In the past six months, have you read, seen, or heard any information about how to get better prepared for a disaster?                                                                      | 7.42E-05    | 1.9074137   |
| 34 | d15_YES                                         | Is English the primary or main language spoken among those living in your household?                                                                                                        | 7.33E-05    | 1.217786404 |
| 35 | white_only                                      | Describe your race.                                                                                                                                                                         | 7.29E-05    | 1.335957195 |
| 36 | qns7_MALE                                       | What is your sex or gender?                                                                                                                                                                 | 7.12E-05    | 1.152331741 |
| 37 | d13_.500.TO..999                                | What is your total MONTHLY household income, before taxes? Please include income from wages and salaries, remittances from family members living elsewhere, farming, and all other sources. | 6.95E-05    | 1.185767829 |

|           |               |                                                                                                            |          |             |
|-----------|---------------|------------------------------------------------------------------------------------------------------------|----------|-------------|
| <b>38</b> | fp4_1_REFUSED | Can you give me a ballpark figure for the amount you have set aside?                                       | 6.72E-05 | 0.928492335 |
| <b>39</b> | qnc7_FEMALE   | What is your sex or gender?                                                                                | 6.37E-05 | 1.089689806 |
| <b>40</b> | a1a_orig201_  | How did you get the information that you read, saw, or heard about getting better prepared for a disaster? | 6.13E-05 | 1.08664111  |
